# Supplementary material
Source: PubMed Central journal article supplement (PMC4339420)

**Appendix Table 1.** Derivation of healthy food availability index for grocery stores

| <b>Food categories</b>      | <b>Score</b>                                                                                                                                                                            |
|-----------------------------|-----------------------------------------------------------------------------------------------------------------------------------------------------------------------------------------|
| Skim/1% milk                | available, 1pt<br>take up $\geq$ 50% shelf space, 1pt                                                                                                                                   |
| Fresh fruits                | not available, 0pt<br>1-5 kinds, 1pt<br>6-8 kinds, 2pt<br>9 kinds, 3pt                                                                                                                  |
| Fresh vegetables            | not available, 0pt<br>1-5 kinds, 1pt<br>6-9 kinds, 2pt<br>10 kinds, 3pt                                                                                                                 |
| Canned beans                | not available, 0pt; available, 1pt                                                                                                                                                      |
| Frozen vegetables           | 1-3 kinds, 1pt<br>4-7 kinds, 2pt                                                                                                                                                        |
| Frozen fruit                | not available, 0pt<br>available, 1pt                                                                                                                                                    |
| Low fat ice cream           | not available, 0pt<br>fat free and light, 1pt                                                                                                                                           |
| Lean ground beef            | available, 1pt                                                                                                                                                                          |
| Ground turkey/chicken       | more than 1 variety, 1pt<br>lean ground turkey available, 1 pt<br>regular ground turkey available, 1 pt<br>ground chicken available, 1pt<br>ground chicken/turkey combo available, 1 pt |
| Fat free hot dog            | available, 1pt                                                                                                                                                                          |
| Low fat frozen dinner       | 1-3 varieties, 1pt<br>4-6+, 2pt                                                                                                                                                         |
| Low fat baked good          | 1-3 varieties, 1pt<br>4-6+, 2pt                                                                                                                                                         |
| Beverages                   | diet soda available, 1pt<br>100% orange juice available, 1pt                                                                                                                            |
| Baked chips                 | baked chips available, 1pt<br>more than 1 variety of low fat potato chips, 1pt<br>more than 1 variety of low fat tortilla chips, 1pt                                                    |
| Whole grain bread           | available, 1pt<br>more than 1 variety, 1pt                                                                                                                                              |
| Low sugar/high fiber cereal | available, 1pt<br>more than 1 variety, 1pt                                                                                                                                              |
| Low fat yogurt              | non fat/reduced fat plain available, 1pt                                                                                                                                                |
| Low fat flavored yogurt     | non fat/reduced fat flavored available, 1pt                                                                                                                                             |
| Low fat cottage cheese      | non fat/reduced fat available, 1pt                                                                                                                                                      |
| Low fat cheddar cheese      | non fat/reduced fat available, 1pt                                                                                                                                                      |

**Appendix Figure 1.** Healthy food availability in Worcester County, MA (2008-2010)

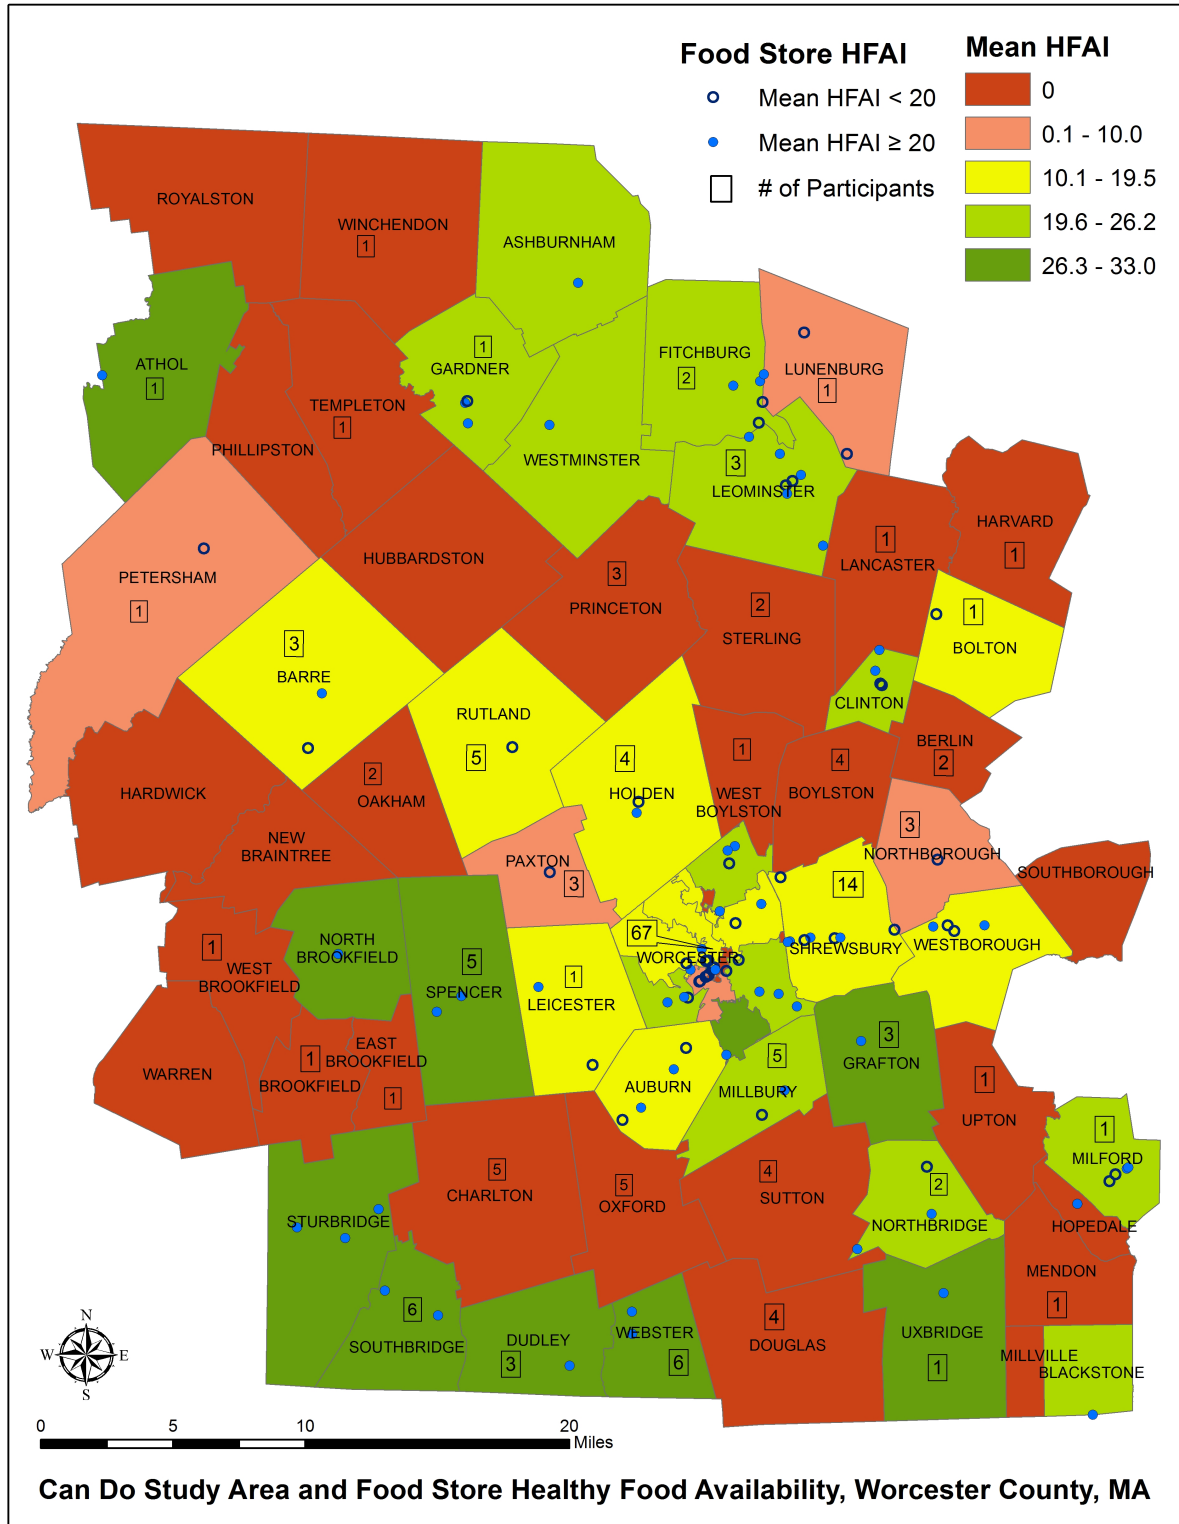

Supplement: NIHMS625081-supplement.pdf [file NIHMS625081-supplement.pdf]
